# Supplementary material for: White-light emitting materials with tunable luminescence based on steady Eu(iii) doping of Tb(iii) metal–organic frameworks
Source: Royal Society of Chemistry journal article supplement (doi:10.1039/c6ra01931e), 2016-01-01

Support Information for:

## White-Light Emitting Materials with Tunable Luminescence based on Steady Eu (III) doping Tb (III) Metal-Organic Frameworks

Jingjuan Liu, Wei Sun, Zhiliang Liu\*

College of Chemistry and Chemical Engineering, Key Lab of Nanoscience and Nanotechnology,  
Inner Mongolia University, Hohhot, 010021, P. R. China \*Corresponding author.

Fax: +86-471-4994375 Tel: +86-471- 4994375

E-mail addresses: cezliu@imu.edu.cn (Z. L. Liu)

### Content

Table S1. Crystal data and structure refinement parameters for **2**.

Table S2. Selected bond distances (Å) and angles (°) for **2**.

Table S3. The initial molar ratio and real content measured by ICP for compounds **3–6**.

Figure S1. The excitation and emission spectroscopy for free H<sub>4</sub>btca ligand(a), phen ligand(b).

Figure S2. IR spectra of MOF-1 (black solid line), ligands Hbtca (red solid line) and phen (blue solid line).

Figure S3. IR spectra of compounds **1–6**.

Figure S4. CIE chromaticity diagram (a), emission spectra (b) and the CIE coordinates for [Eu<sub>x</sub>Tb<sub>1-x</sub>(Hbtca)(phen)] (**3–6**) upon the excitation at 275 nm.

Figure S5. CIE chromaticity diagram for [Eu<sub>x</sub>Tb<sub>1-x</sub>(Hbtca)(phen)] (**3–6**) by change excitation wavelength from 330nm to 365nm and the photo under 365nm xenon lamp. (a) [Eu<sub>0.05</sub>Tb<sub>0.95</sub>(Hbtca)(phen)], (b) [Eu<sub>0.0333</sub>Tb<sub>0.9667</sub>(Hbtca)(phen)], (c) [Eu<sub>0.025</sub>Tb<sub>0.975</sub>(Hbtca)(phen)] and (d) [Eu<sub>0.0167</sub>Tb<sub>0.9833</sub>(Hbtca)(phen)]

Table S4. The CIE coordinate for [Eu<sub>x</sub>Tb<sub>1-x</sub>(Hbtca)(phen)] (**3–6**) by change excitation wavelength from 330nm to 365nm.

Figure S6. The luminescence decay curves for (a) Tb-MOF, (b) Eu-MOF and (c) Eu<sub>0.0167</sub>Tb<sub>0.9833</sub>-MOF.

**Table S1.** Crystal data and structure refinement for **2**.

|                                                | <b>Eu-MOF</b>                                                                  |
|------------------------------------------------|--------------------------------------------------------------------------------|
| Empirical formula                              | C <sub>56</sub> H <sub>30</sub> Eu <sub>2</sub> N <sub>4</sub> O <sub>16</sub> |
| Formula weight                                 | 1318.76                                                                        |
| Temperature(K)                                 | 293(2)                                                                         |
| Wavelength(Å)                                  | 1.54178                                                                        |
| Crystal system                                 | Triclinic                                                                      |
| Space group                                    | <i>P</i> -1                                                                    |
| a/Å                                            | 11.6136(6)                                                                     |
| b/Å                                            | 13.4816(8)                                                                     |
| c/Å                                            | 16.2810(11)                                                                    |
| α/(°)                                          | 89.934(5)                                                                      |
| β/(°)                                          | 78.409(5)                                                                      |
| γ/(°)                                          | 71.845(5)                                                                      |
| Volume/Å <sup>3</sup>                          | 2367.6(2)                                                                      |
| Z                                              | 2                                                                              |
| Calculated density/ Mg/m <sup>3</sup>          | 1.850                                                                          |
| Absorption coefficient/ mm <sup>-1</sup>       | 19.480                                                                         |
| F(000)                                         | 1296                                                                           |
| Crystal size/ mm <sup>3</sup>                  | 0.09 x 0.08 x 0.08                                                             |
| Theta range for data collection/°              | 2.78 – 67.02                                                                   |
| Limiting indices                               | -13 ≤ h ≤ 13<br>-15 ≤ k ≤ 16<br>-19 ≤ l ≤ 14                                   |
| Reflections collected / unique                 | 14745 / 8435 [R(int) = 0.0927]                                                 |
| Completeness to theta = 67.02                  | 99.8 %                                                                         |
| Absorption correction                          | Semi-empirical from equivalents                                                |
| Max. and min. transmission                     | 0.3048 and 0.2731                                                              |
| Refinement method                              | Full-matrix least-squares on F <sup>2</sup>                                    |
| Data / restraints / parameters                 | 8435 / 12 / 704                                                                |
| Goodness-of-fit on F <sup>2</sup>              | 1.029                                                                          |
| Final R indices [I>2σ(I)]                      | R1 = 0.0743, wR2 = 0.1696                                                      |
| R indices (all data)                           | R1 = 0.1036, wR2 = 0.1981                                                      |
| Largest diff. peak and hole/ e.Å <sup>-3</sup> | 1.956 and -1.413                                                               |

**Table S2.** Bond lengths [Å] and angles [°] for **2**.

| <b>Bond lengths [Å]</b> |            |                     |            |
|-------------------------|------------|---------------------|------------|
| Eu(1)–O(6)              | 2.368(7)   | Eu(2)–O(2)          | 2.515(8)   |
| Eu(1)–O(5)A             | 2.389(7)   | Eu(2)–O(3)C         | 2.533(9)   |
| Eu(1)–O(10)             | 2.429(8)   | Eu(2)–N(4)          | 2.580(9)   |
| Eu(1)–O(11)A            | 2.482(7)   | Eu(2)–N(3)          | 2.603(11)  |
| Eu(1)–O(12)A            | 2.507(8)   | Eu(2)–Eu(2)C        | 3.9580(12) |
| Eu(1)–N(1)              | 2.537(8)   | O(2)–Eu(2)C         | 2.366(7)   |
| Eu(1)–N(2)              | 2.581(8)   | O(3)–Eu(2)C         | 2.533(9)   |
| Eu(1)–O(9)              | 2.654(9)   | O(4)–Eu(2)C         | 2.455(8)   |
| Eu(1)–Eu(1)A            | 3.8740(11) | O(5)–Eu(1)A         | 2.389(7)   |
| Eu(2)–O(2)C             | 2.366(7)   | O(11)–Eu(1)A        | 2.482(7)   |
| Eu(2)–O(13)B            | 2.420(8)   | O(12)–Eu(1)A        | 2.507(8)   |
| Eu(2)–O(14)D            | 2.429(7)   | O(13)–Eu(2)E        | 2.420(8)   |
| Eu(2)–O(4)C             | 2.455(8)   | O(14)–Eu(2)D        | 2.429(7)   |
| Eu(2)–O(1)              | 2.467(8)   |                     |            |
| <b>Angles [°]</b>       |            |                     |            |
| O(6)–Eu(1)–O(5)A        | 139.4(3)   | O(4)C–Eu(2)–O(3)C   | 51.7(3)    |
| O(6)–Eu(1)–O(10)        | 122.6(3)   | O(1)–Eu(2)–O(3)C    | 148.3(3)   |
| O(5)A–Eu(1)–O(10)       | 74.2(3)    | O(2)–Eu(2)–O(3)C    | 132.2(3)   |
| O(6)–Eu(1)–O(11)A       | 71.3(2)    | O(2)C–Eu(2)–N(4)    | 140.8(3)   |
| O(5)A–Eu(1)–O(11)A      | 74.0(3)    | O(13)B–Eu(2)–N(4)   | 140.2(3)   |
| O(10)–Eu(1)–O(11)A      | 139.3(3)   | O(14)D–Eu(2)–N(4)   | 79.2(3)    |
| O(6)–Eu(1)–O(12)A       | 78.3(3)    | O(4)C–Eu(2)–N(4)    | 97.4(3)    |
| O(5)A–Eu(1)–O(12)A      | 96.3(3)    | O(1)–Eu(2)–N(4)     | 80.5(3)    |
| O(10)–Eu(1)–O(12)A      | 157.0(3)   | O(2)–Eu(2)–N(4)     | 125.0(3)   |
| O(11)A–Eu(1)–O(12)A     | 51.8(2)    | O(3)C–Eu(2)–N(4)    | 74.7(3)    |
| O(6)–Eu(1)–N(1)         | 83.2(2)    | O(2)C–Eu(2)–N(3)    | 144.6(3)   |
| O(5)A–Eu(1)–N(1)        | 136.9(3)   | O(13)B–Eu(2)–N(3)   | 76.7(3)    |
| O(10)–Eu(1)–N(1)        | 88.1(3)    | O(14)D–Eu(2)–N(3)   | 139.4(3)   |
| O(11)A–Eu(1)–N(1)       | 132.7(2)   | N(4)–Eu(2)–N(3)     | 63.6(3)    |
| O(12)A–Eu(1)–N(1)       | 84.9(3)    | O(2)C–Eu(2)–O(13)B  | 75.8(3)    |
| O(6)–Eu(1)–N(2)         | 137.4(3)   | O(2)C–Eu(2)–O(14)D  | 75.5(2)    |
| O(5)A–Eu(1)–N(2)        | 75.3(3)    | O(13)B–Eu(2)–O(14)D | 137.3(2)   |
| O(10)–Eu(1)–N(2)        | 84.5(3)    | O(2)C–Eu(2)–O(4)C   | 73.9(3)    |
| O(11)A–Eu(1)–N(2)       | 111.0(3)   | O(13)B–Eu(2)–O(4)C  | 75.4(3)    |
| O(12)A–Eu(1)–N(2)       | 72.7(3)    | O(14)D–Eu(2)–O(4)C  | 124.7(3)   |
| N(1)–Eu(1)–N(2)         | 64.0(3)    | O(2)C–Eu(2)–O(1)    | 123.8(2)   |

|                   |          |                    |          |
|-------------------|----------|--------------------|----------|
| O(6)–Eu(1)–O(9)   | 73.3(3)  | O(13)B–Eu(2)–O(1)  | 89.1(3)  |
| O(5)A–Eu(1)–O(9)  | 120.0(3) | O(14)D–Eu(2)–O(1)  | 81.4(3)  |
| O(10)–Eu(1)–O(9)  | 50.7(3)  | O(4)C–Eu(2)–O(1)   | 153.3(3) |
| O(11)A–Eu(1)–O(9) | 133.6(3) | O(2)C–Eu(2)–O(2)   | 71.6(3)  |
| O(12)A–Eu(1)–O(9) | 143.7(3) | O(13)B–Eu(2)–O(2)  | 72.7(3)  |
| N(1)–Eu(1)–O(9)   | 69.8(3)  | O(14)D–Eu(2)–O(2)  | 68.6(2)  |
| N(2)–Eu(1)–O(9)   | 115.3(3) | O(4)C–Eu(2)–O(2)   | 137.6(3) |
| O(4)C–Eu(2)–N(3)  | 77.9(3)  | O(1)–Eu(2)–O(2)    | 52.2(2)  |
| O(1)–Eu(2)–N(3)   | 77.4(3)  | O(2)C–Eu(2)–O(3)C  | 70.1(3)  |
| O(2)–Eu(2)–N(3)   | 120.0(3) | O(13)B–Eu(2)–O(3)C | 122.6(3) |
| O(3)C–Eu(2)–N(3)  | 107.8(3) | O(14)D–Eu(2)–O(3)C | 74.9(3)  |

Symmetry transformations used to generate equivalent atoms:

A:  $-x, -y+2, -z+2$     B:  $x, y-1, z$     C:  $-x, -y+1, -z+1$     D:  $-x, -y+2, -z+1$     E:  $x, y+1, z$

**Table S3.** The initial molar ratio and real content measured by ICP for compounds **3–6**.

| Compound | Initial molar ratio | ICP  |       |
|----------|---------------------|------|-------|
|          |                     | Tb   | Eu    |
| <b>3</b> | 1:59                | 1.83 | 98.17 |
| <b>4</b> | 1:39                | 2.80 | 97.20 |
| <b>5</b> | 1:29                | 3.46 | 96.54 |
| <b>6</b> | 1:19                | 5.61 | 94.39 |

**Figure S1.** The excitation and emission spectroscopy for free H<sub>4</sub>btca ligand(a), phen ligand(b).

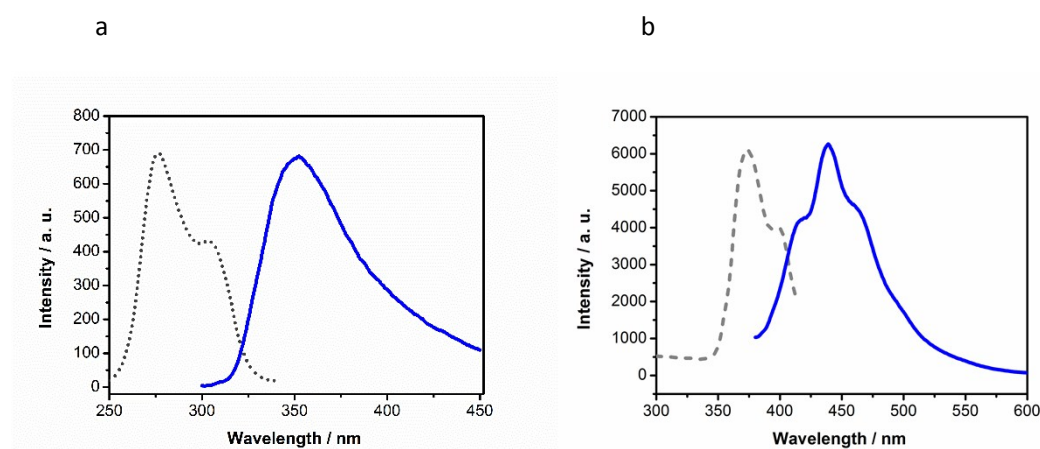

**Figure S2.** IR spectra of MOF-1 (black solid line), ligands Hbtca (red solid line) and phen (blue solid line).

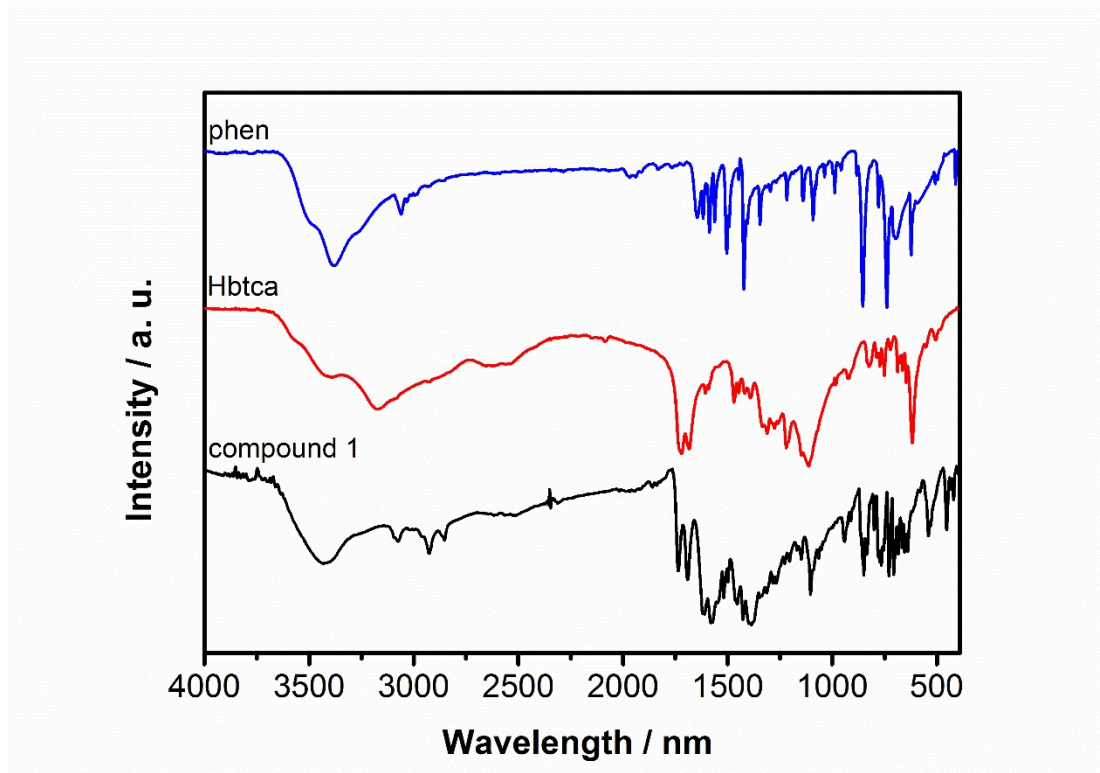

**Figure S3.** IR spectra of compounds 1–6.

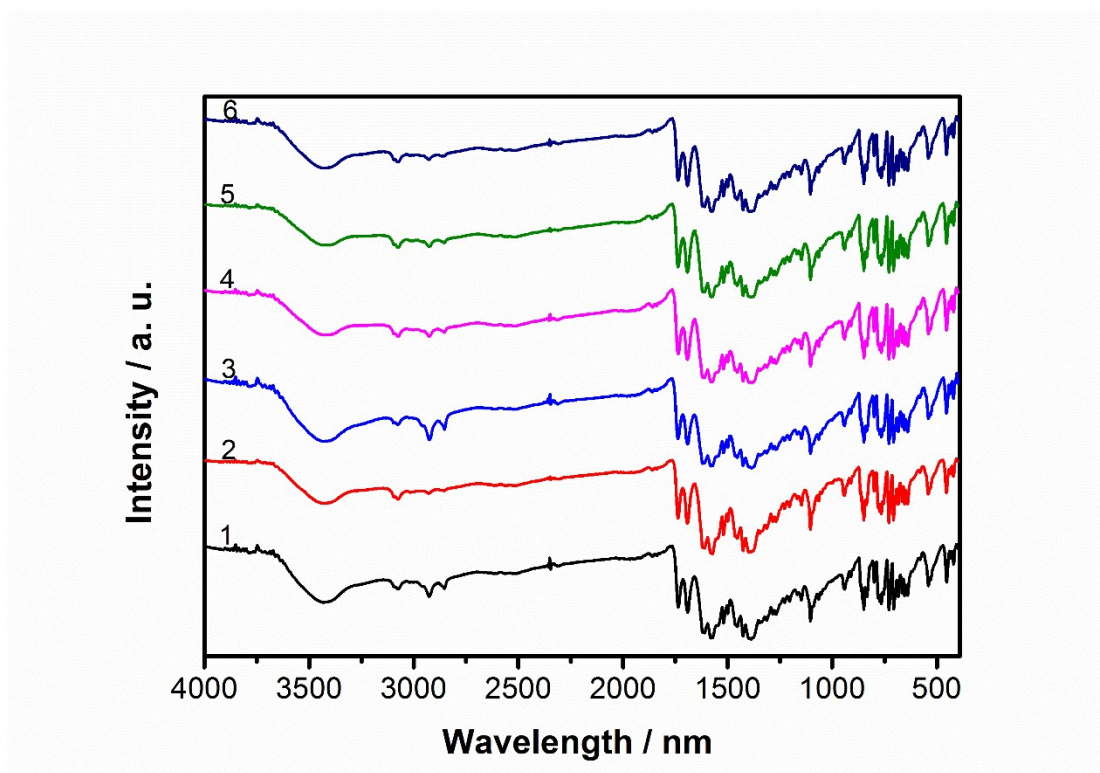

**Figure S4.** CIE chromaticity diagram (a), emission spectra (b) and the CIE coordinates for  $[\text{Eu}_x\text{Tb}_{1-x}(\text{Hbtca})(\text{phen})]$  (**3–6**) upon the excitation at 275 nm.

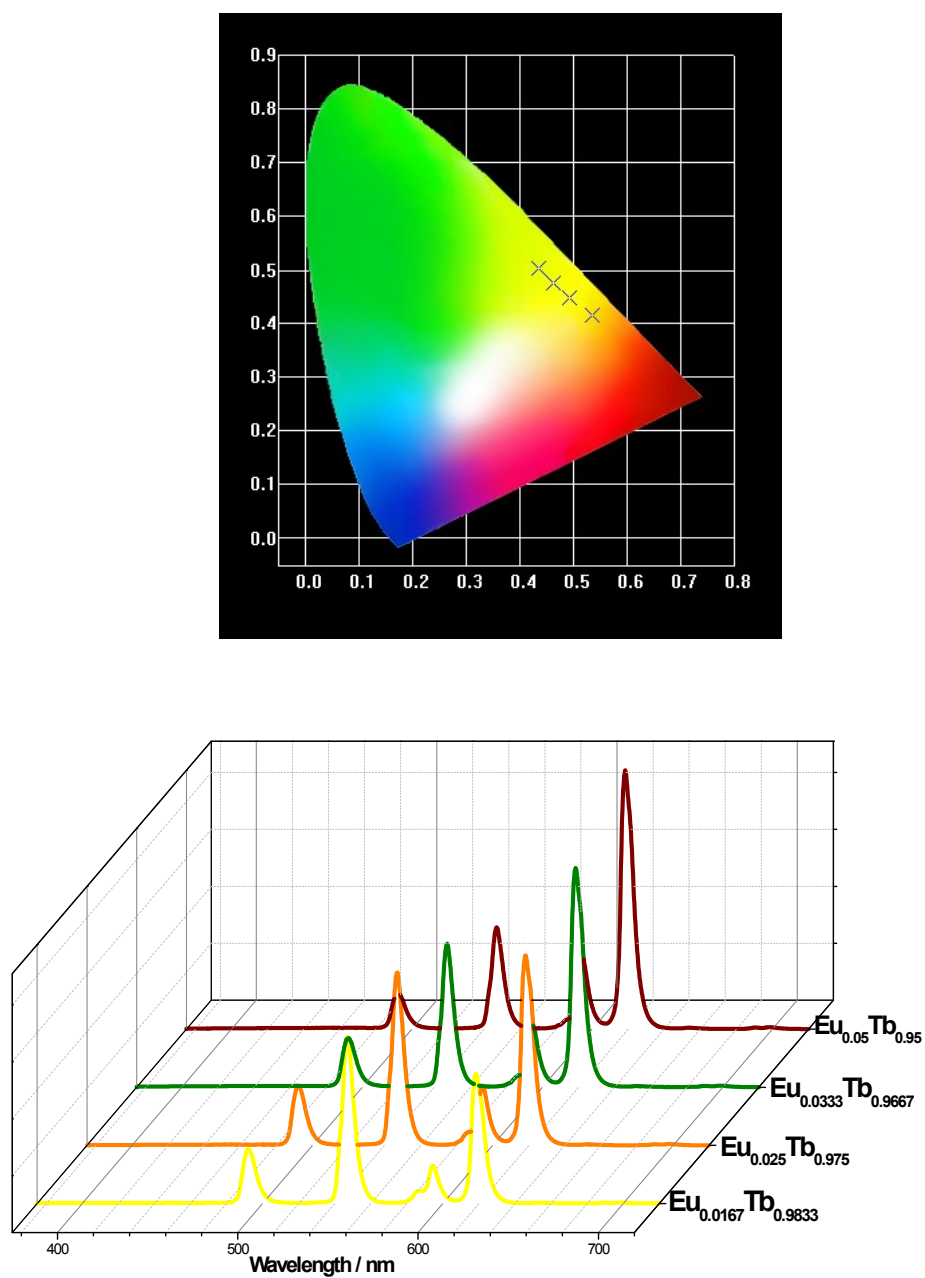

| Compound | CIE coordinates                    |
|----------|------------------------------------|
|          | $\lambda_{\text{ex}}=275\text{nm}$ |
| <b>3</b> | (0.436,0.5022)                     |
| <b>4</b> | (0.4633,0.4757)                    |
| <b>5</b> | (0.4929,0.4483)                    |
| <b>6</b> | (0.5351,0.4148)                    |

**Figure S5.** CIE chromaticity diagram for  $[\text{Eu}_x\text{Tb}_{1-x}(\text{Hbtca})(\text{phen})]$  (**3–6**) by change excitation wavelength from 330nm to 365nm and the photo under 365nm xenon lamp. (a)  $[\text{Eu}_{0.05}\text{Tb}_{0.95}(\text{Hbtca})(\text{phen})]$ , (b)  $[\text{Eu}_{0.0333}\text{Tb}_{0.9667}(\text{Hbtca})(\text{phen})]$ , (c)  $[\text{Eu}_{0.025}\text{Tb}_{0.975}(\text{Hbtca})(\text{phen})]$  and (d)  $[\text{Eu}_{0.0167}\text{Tb}_{0.9833}(\text{Hbtca})(\text{phen})]$

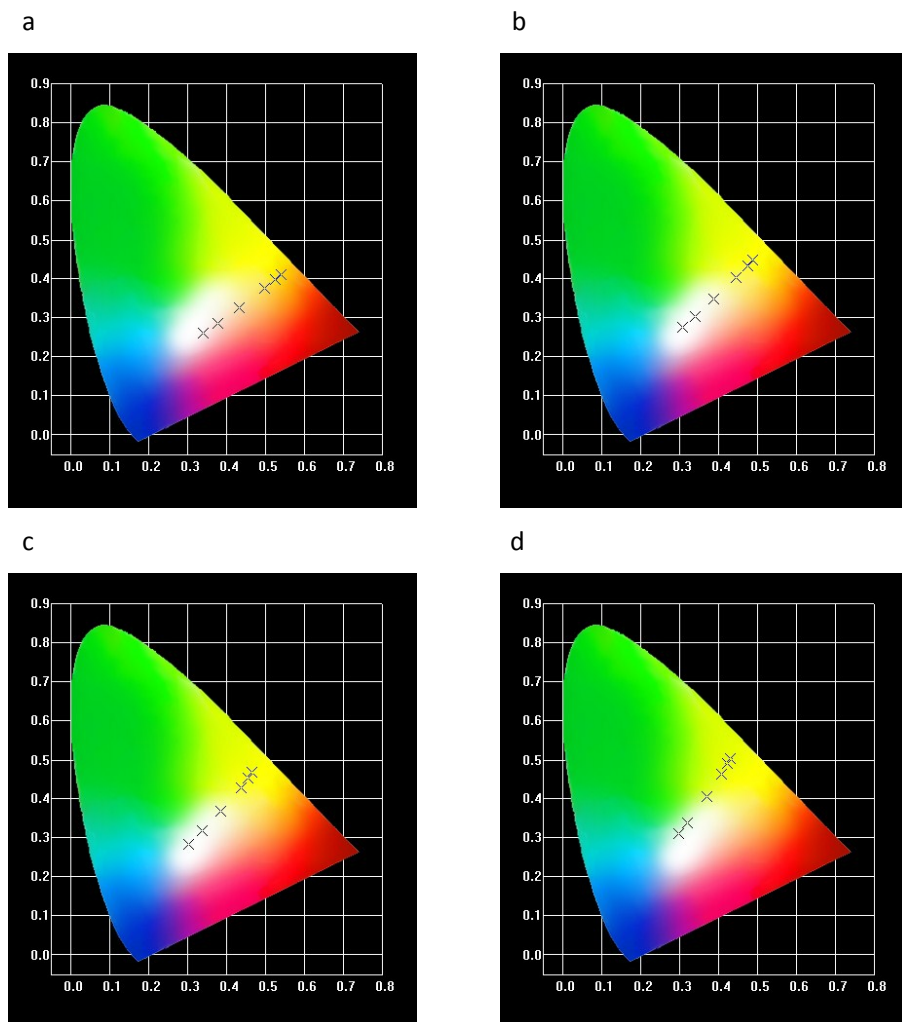

**Table S4.** The CIE coordinate for  $[\text{Eu}_x\text{Tb}_{1-x}(\text{Hbtca})(\text{phen})]$  (**3–6**) by change excitation wavelength from 330nm to 365nm.

|       | <b>3</b>        | <b>4</b>        | <b>5</b>        | <b>6</b>        |
|-------|-----------------|-----------------|-----------------|-----------------|
| 330nm | (0.4296,0.5022) | (0.4660,0.4681) | (0.4869,0.4464) | (0.5390,0.4095) |
| 340nm | (0.4220,0.4888) | (0.4560,0.4536) | (0.4762,0.4329) | (0.5247,0.3963) |
| 350nm | (0.4063,0.4636) | (0.4383,0.4268) | (0.4456,0.4036) | (0.4982,0.3744) |

---

|       |                 |                 |                 |                 |
|-------|-----------------|-----------------|-----------------|-----------------|
| 355nm | (0.3709,0.4043) | (0.3854,0.3678) | (0.3872,0.3470) | (0.4337,0.3262) |
|       |                 |                 |                 | )               |
| 360nm | (0.3199,0.3381) | (0.3377,0.3164) | (0.3409,0.3024) | (0.3779,0.2858) |
|       |                 |                 |                 | )               |
| 365nm | (0.2975,0.3111) | (0.3037,0.2833) | (0.3081,0.2753) | (0.3392,0.2607) |
|       |                 |                 |                 | )               |

---

**Figure S6.** The luminescence decay curves for (a) Tb-MOF, (b) Eu-MOF and (c)  $\text{Eu}_{0.0167}\text{Tb}_{0.9833}$ -MOF.

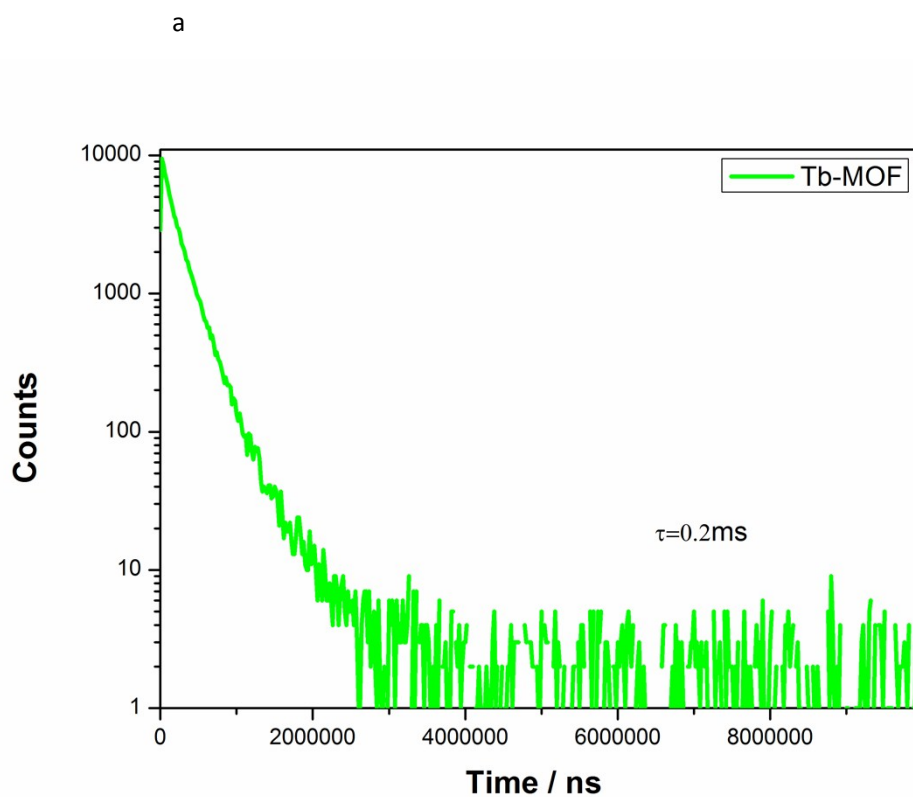

b



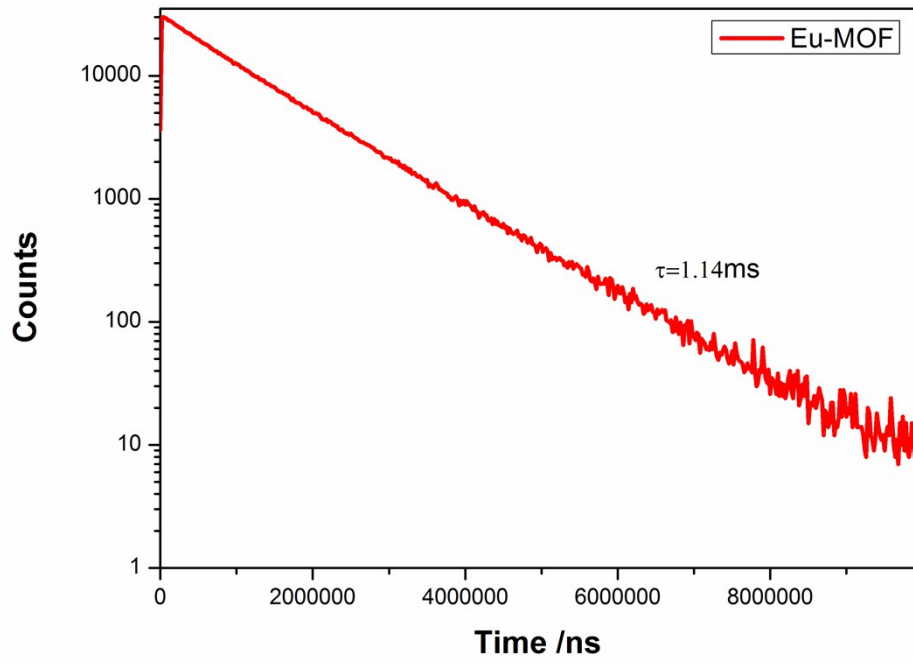

c

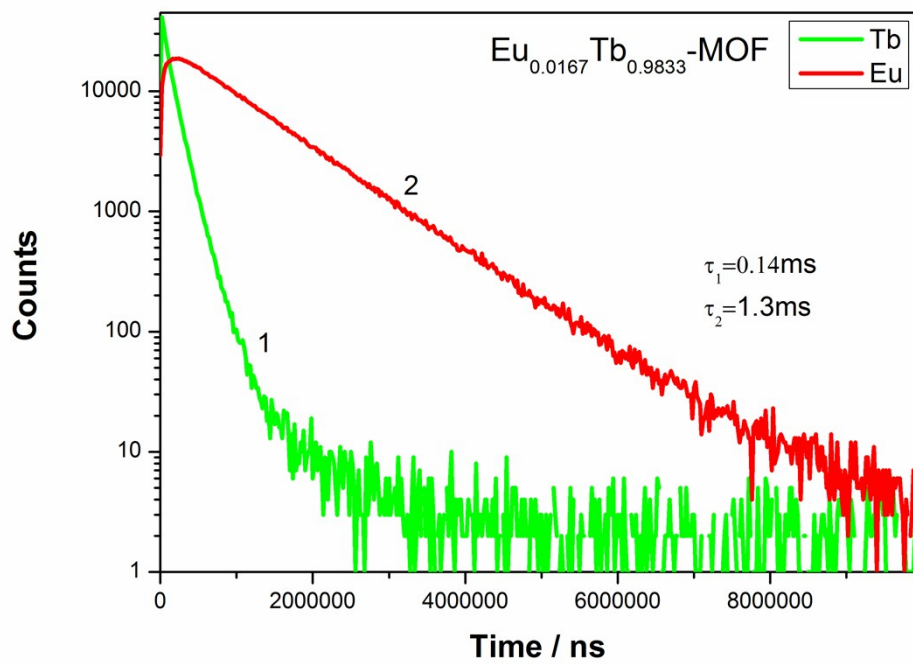

Supplement: c6ra01931e1.pdf [file c6ra01931e1.pdf]
